# Supplementary material
Source: bioRxiv or medRxiv preprint supplement (https://www.biorxiv.org/highwire/filestream/36440/field_highwire_adjunct_files/3/124396-4.pdf)
Supplement: Supplementary file [file 124396-4.pdf]

### Supplementary dataset S3: PCA and OPLS models summaries.

#### Cumulative proportion of variation in the dataset explained by each component in the PCA model

| Component No. | Cumulative fraction of the sum of squares explained by the component(s): "R2X(cum)" |
|---------------|-------------------------------------------------------------------------------------|
| Comp[1]       | 0.159543                                                                            |
| Comp[2]       | 0.302585                                                                            |
| Comp[3]       | 0.407947                                                                            |
| Comp[4]       | 0.506009                                                                            |
| Comp[5]       | 0.575514                                                                            |
| Comp[6]       | 0.638655                                                                            |
| Comp[7]       | 0.693675                                                                            |
| Comp[8]       | 0.744602                                                                            |
| Comp[9]       | <b>0.785956</b>                                                                     |

#### OPLS model summary

| OPLS model: 1 predictive component & 1, 2 or 3 orthogonal component | Fraction of the variation explained by the model: "R2Y(cum)" | Fraction of of the variation related to TWG that can be predicted by the model: "Q2(cum)" |
|---------------------------------------------------------------------|--------------------------------------------------------------|-------------------------------------------------------------------------------------------|
| Comp[1+0]                                                           | 0.676476                                                     | 0.399173                                                                                  |
| Comp[1+1]                                                           | 0.861713                                                     | 0.545341                                                                                  |
| Comp[1+2]                                                           | 0.915427                                                     | 0.656604                                                                                  |
| Comp[1+3]                                                           | <b>0.943066</b>                                              | <b>0.747226</b>                                                                           |
